# Supplementary material for: Polymorphisms and genetic effects of PRLR, MOGAT1, MINPP1 and CHUK genes on milk fatty acid traits in Chinese Holstein
Source: BMC Genet. 2019 Aug 16;20:69. doi: 10.1186/s12863-019-0769-1 (PMC6698030; doi:10.1186/s12863-019-0769-1)
Supplement: Supplementary file 1 — Table S1. Details of PCR primers of PRLR, MOGAT1, MINPP1, and CHUK genes. (XLSX 20 kb) [file 12863_2019_769_MOESM1_ESM.xlsx]

## Sheet: Sheet1
Table S1 Details of PCR primers of PRLR, MOGAT1, MINPP1, and CHUK genes
Gene	Primer	Location	Primer sequences (5’- 3’)	Product size (bp)	Annealing Temp (℃）
PRLR	PRLR-1	5′ flanking region	F-GGAGGTGGGATCAAATGAAA	738**	60
			R-CAAAAGGAGCCATAATGGTGA
	PRLR-2	5′ flanking region	F-AGAAGAGGAAGGGTGCAGTG	772	60
			R-CAAGGCATCACCAGGTTTTT
	PRLR-3	5′ flanking region	F-GGGAACCACAAACAGGAAGA	810	60
			R-TGGCAATAACAAAACCATGC
	PRLR-4	5′ flanking region	F-CCTTCAGGCAGCTACTACTTTTG	770	60
			R-CTTTCTTTGCGAGAGGAGGA
	PRLR-5	exon 2	F-GTGCCTTTTCCCAGGTTGTA	406	60
			R-CACTCTCTCCCTGGAACAGC
	PRLR-6	exon 4	F-ATTTTTCCCAGCGTATGCAC	559**	60
			R-TCCCAGAATGAGGATGGAAG
	PRLR-7	exon 5	F-TGCTGACATCTTGGCACTTC	547	60
			R-TACGACAGGCAACGGTAACA
	PRLR-8	exon 7	F-GCCTAGCCCAACTCTGCTG	543	60
			R-GTCCTGGGAGAGCTCTGATG
	PRLR-9	exon 8	F-GCAGAGAGGGTGAAATGGTG	504	60
			R-TGGCCTAGGGAAAGATGCTA
	PRLR-10	exon 9	F-TAGAGGGGCAGGGGACTTAT	404	60
			R-GCCTCCATTTGATGGAAAGA
	PRLR-11	exon 11	F-GCGTTCACTTTGATTGCAGA	724	60
			R-AGCAGAGATCAAGGGGGTTT
	PRLR-12	exon 11	F-AGTTCCAAGCCTGACCAAGA	727	60
			R-AAACCATGAAGGCCTTTTCC
	PRLR-13	exon 11	F-CGTTCCATCTTGTGTGATTTG	751	60
			R-CTTCCATGAGCATCCTGCTA
	PRLR-14	exon 11	F-GGCAAATGAGTTTCATGTGGT	782	60
			R-TTTCCACTCTCCTTCTTCATCTG
	PRLR-15	exon 11	F-TGTAATTTAGGGCCACTCTGG	811	60
			R-TTGCAGATCATTCTCGTCCA
	PRLR-16	exon 11	F-TTCCCGGAAAGTACAGGTTG	770	60
			R-TGAGCACATCACTGAAGAGGA
	PRLR-17	exon 11	F-GCAAAGATGATTAACCGATGC	785	60
			R-CCCCTTTCAGTTGGGTCACT
	PRLR-18	exon 11	F-CAATCCCAACTGGTTTGGTC	771	60
			R-TAATGATGCATGGGCTGAAA
	PRLR-19	exon 11	F-CGCAGGATTGCTGATGTAGA	500	60
			R-AGGAGAAATGGAGGCCCTAA
	PRLR-20	exon 11	F-GCAAGTCCCATCGATTTCAT	704	60
			R-TGTGCCAGGTCTTAGCTGTG
	PRLR-21	exon 11	F-CCCTGGTCACGGAACTAAGA	725	60
			R-GCAGCTTCGAAAGAAGGACA
	PRLR-22	exon 11	F-TGGCAAAGAGTCTCCTAAACAA	748	60
			R-TATGGAACCTTTGGCTGTCC
	PRLR-23	exon 11	F-CTCATGCAGAAACCAAAGCA	764	60
			R-GCTATCCACAGCGTCCTCTC
	PRLR-24	exon 11	F-TTTCTGTTGCCCTTGGATTT	752	60
			R-AAGCAAACCTCACACCATCC
	PRLR-25	exon 11	F-TGCAGAATTATGGGATGGTG	716	60
			R-CCTTCAGGGGATCTTTCCA
	PRLR-26	exon 11	F-TATGGGAGACCTGGGTTCAA	785	60
			R-GCAAAAGCAGTTGCTCTGAA
	PRLR-27	exon 11	F-GACATTTGGCAGTAGTTTTGCTT	786	60
			R-TGGCATATTTGGTGCAAAAG
	PRLR-28	3′ flanking region	F-GCGATTGACCCTTCCATTTA	807	60
			R-GCATGCAGCAGAGAGAACTG
	PRLR-29	3′ flanking region	F-ATCCCTTCCCCTCATTCTTC	760	60
			R-GGGACACTGGAGCAGGAATA
	PRLR-30	3′ flanking region	F-ACATCTGGGCATCTCTTCCA	770	60
			R-AAAAATGGGCAGGAAGTGC
	PRLR-31	3′ flanking region	F-GCACTTCCTGCCCATTTTT	307	60
			R-CAGTTGTGTCCGACTCTTCG
MOGAT1	MOGAT1-1	5′ flanking region	F-CAGCCACGAAGAAAGCAGTT	746**	60
			R-ACCTTCCAAAGACCCAGCTT
	MOGAT1-2	5′ flanking region	F-CAGGACGATGCTTTTCAACA	720	60
			R-TACAGAATGTCGGCTTGCAG
	MOGAT1-3	5′ flanking region	F-CTGTGGGCTCACTCAGTTCA	834	60
			R-GCCCCTTTCTCCTTCAACAT
	MOGAT1-4	5′ flanking region	F-AAACCCAGCAAGTTTTGCAT	734	60
			R-AACTCAAGCAAAGGGAAGCA
	MOGAT1-5	5′ flanking region	F-GATTCGTGGCCACTGTTTTT	745**	60
			R-AACTCGGGTTCCTGCAATTA
	MOGAT1-6	exon 1	F-GTGGGAGAGCCTAACCCTTC	787	60
			R-CAAAGAGGGGAATCCCAAAT
	MOGAT1-7	exon 2	F-ACAACACCTTGACCCAGTGA	607	60
			R-GTTTGCCATTCCCTTCTTCA
	MOGAT1-8	exon 4	F-CCCATCTGAATGCACTTGAA	557	60
			R-ACAAGTTGAATGGCTGGATG
	MOGAT1-9	exon 5	F-GGCTTGGGGACATTAAACAA	740	60
			R-CCTAGTTGGGAACAAAATGCTT
	MOGAT1-10	3′ flanking region	F-TTTGAAGGGCTTCCCTAATG	660	60
			R-TTCTTACAAACCAGCCCACA
	MOGAT1-11	3′ flanking region	F-AAAAGACCCACTTTCAGAAGGA	651	60
			R-GAATTCCCTGGCAGTCCAGT
	MOGAT1-12	3′ flanking region	F-TTGTCAAAGCCGGAAATAGG	711	60
			R-AACTGCTCGCTAGACAATCCA
	MOGAT1-13	3′ flanking region	F-TCTATGGGGTTGCAAAGAGC	821	60
			R-GCTGCAGGACAAAGGAAATG
MINPP1	MINPP1-1	5′ flanking region	F-GGGGGCTACACCTAGAGCAT	518	60
			R-TGAAGAGATGGGGGAATGAG
	MINPP1-2	5′ flanking region	F-TCATTTGGGTTGTCTCAGAGC	715	60
			R-CGTTCTCTGAGGCTTGGTTT
	MINPP1-3	5′ flanking region	F-TCTCAAAGAATTCCTGCAGTATAGG	761	60
			R-GCAAACATTTGTTCCAGATGC
	MINPP1-4	5′ flanking region	F-TTGAGCACAGCTCTGTGAAAT	513	60
			R-CCAGGTTCCTCAGTCAATGG
	MINPP1-5	exon 1	F-GGTGGCTCGGTCAGTAAAGA	741	60
			R-AAGCTGACATCAGCGAGACA
	MINPP1-6	exon 1	F-TGGTGGTAAATACAGACCTCGTT	738	60
			R-ATCTCAGCACTCCGGCTCT
	MINPP1-7	exon 1	F-GCCACAGATCTCCAAAACTCC	555	60
			R-ATCTGTTTGGTCGTCGGGTA
	MINPP1-8	exon 2	F-AGTTGTGCCCCATGTCTTTC	717	60
			R-ATAATGCTTGGGGTTGAAGC
	MINPP1-9	exon 3	F-TATTCAGCCTTTGGAAAACTGC	500	60
			R-ATTCATGGCGTTGCAAAGAG
	MINPP1-10	exon 4	F-TCTCTGGGTCTCACCCTTAAA	573	60
			R-CAGGGGAGAGTGGAAAATGA
	MINPP1-11	exon 5	F-TCTGCCACACAGAATTTAGCC	747	60
			R-ATTTCCCATGAGAGCTGCTT
	MINPP1-12	exon 5	F-GCAGTCCCTGGGTACAGAAA	832**	60
			R-TGAAAGCCCACCAGTATGAA
	MINPP1-13	3′ flanking region	F-CGCCATTGATCTTCAACTGAG	803	60
			R-AGCACCAGAATAATGTCACAGC
	MINPP1-14	3′ flanking region	F-TTTCAGGATAGAGGGTGAGTGT	303	60
			R-GAACAGAAAATGACGAATGTTCA
CHUK	CHUK-1	5′ flanking region	F-AAGAGCTAAGACCTGGGCTG	817	60
			R-TAAGGCCTTGGGTCCCTTCT
	CHUK-2	5′ flanking region	F-ATCCCAGGATCTCACAGGTG	701	60
			R-CCTGGCTGGTTACCTTCAG
	CHUK-3	5′ flanking region	F-CACTTACGGCCCAGACACTC	776	60
			R-GTCAGTTGCCCCTCCTTTGA
	CHUK-4	5′ flanking region	F-TCAAAGGAGGGGCAACTGAC	615**	60
			R-CCACCCTTGTCTACGCTTCA
	CHUK-5	exon 1	F-CCTTTACCAGTGGCAGCTCA	747	60
			R-CTCTCTCACACACTGCCCAG
	CHUK-6	exon 2	F-GCCATTGCCTTCTCCGAGTA	313	60
			R-TCTGGGTGGGTTGCAAAACT
	CHUK-7	exon 3	F-TCTTTTGTCCCCTCACTGCC	377	60
			R-TCTCTGGCACCACTACTCGA
	CHUK-8	exon 4	F-TGTCCTCTGTGTGGATTTGGT	673	60
			R-TCTGGCCTTCTGAGCTCTCT
	CHUK-9	exon 5	F-AAAATTGAGCATCAGACCAGATC	421	60
			R-GCTCTGCTAGATACTGTGCTGG
	CHUK-10	exon 6,7	F-TCTTCACCACCTCCCTCTCC	692	60
			R-TGGCTACTAAACCGAACTTCTCC
	CHUK-11	exon 8	F-CCCTCTGGCTGCCTTTCTTT	659	60
			R-AAATCCCAAACCCACATGCG
	CHUK-12	exon 9	F-AACTTGCGCATGTGGGTTTG	626	60
			R-AGTTCATGCTGTACGGACTGT
	CHUK-13	exon 10	F-AGTAGCTAGCACTGAATCGTTT	497	60
			R-AGGATGGAAGTGGCACCAAA
	CHUK-14	exon 11	F-TGAACTTAACTTCTCTGTTGGCA	413	60
			R-ATGAGGGGTCTGGTGGTGAT
	CHUK-15	exon 12	F-ACAGGGCTCAAGTACGTGTG	740	60
			R-AGACTTAACCTAAACCACAGCA
	CHUK-16	exon 13	F-GCTCTTTCAGGGGCAGAGAG	797	60
			R-GGTGAGGGGTGGGTAGAGTA
	CHUK-17	exon 14	F-GCCTCTGTTGTGAAATGGAGC	697	60
			R-AAACCAAGATGTCCAGCCGT
	CHUK-18	exon 15	F-TCGTGTTGTGTGGTGGTGAG	466	60
			R-GCTGAGTCCCTTCGCTACAT
	CHUK-19	exon 16	F-TCATTGGCAATATCAGAGCAGA	581	60
			R-CATGTCCTACTCTGCCACCC
	CHUK-20	exon 18	F-ACGCTGCAGAACTTAGCCAT	609	60
			R-CAGCCAGGCACATCTATCCC
	CHUK-21	exon 20	F-CATTGGGTTGCTGGGTTGTG	511	60
			R-ACTGGGGAAAACTGACTGCA
	CHUK-22	exon 21	F-TGAACACCCACATACCTATTGCT	592	60
			R-ACAAATGCACAGTCCCTTTCC
	CHUK-23	exon 21	F-GCTTGTGTTGTACTTGTGTTGC	648**	60
			R-ACCATCTTGAAGGCACCCAA
	CHUK-24	3′ flanking region	F-GACCTTGGGATTGTCTTCACCT	746	60
			R-TAAAGCAAGCCCTCCCAGAC
	CHUK-25	3′ flanking region	F-GTCTGGGAGGGCTTGCTTTA	727	60
			R-CCGGAGCTTGCTCAAACTCT
	CHUK-26	3′ flanking region	F-TGGAAGGACTGATGCTGAAGG	703	60
			R-GTCTTGTCTGCGTGCTGTTG
	CHUK-27	3′ flanking region	F-GCTTCTTTCCTCTGCCCCTT	720	60
			R-CGCTCACCTGTAGTACACGG
Note: ** referred that SNPs were detected.
