# Supplementary material for: Polymorphisms and genetic effects of PRLR, MOGAT1, MINPP1 and CHUK genes on milk fatty acid traits in Chinese Holstein
Source: BMC Genet. 2019 Aug 16;20:69. doi: 10.1186/s12863-019-0769-1 (PMC6698030; doi:10.1186/s12863-019-0769-1)
Supplement: Supplementary file 2 — Table S2. Information about the 11 identified SNPs. (XLSX 10 kb) [file 12863_2019_769_MOESM2_ESM.xlsx]

## Sheet: Sheet1
Table S2 Information about the 11 identified SNPs
Genes	SNPs name	Gene region	Position (UMD 3.1)	Allele	Amino acid substitution	Gen Bank no.	Origin
PRLR	g.38948871C>T	5′ flanking region	Chr20: 38948871	C/T		rs210259082	NCBI
	g.38949011G>A	5′ flanking region	Chr20: 38949011	G/A		rs379452444	NCBI
	g.39115344G>A	Exon-4	Chr20: 39115344	G/A	p.Ser18Asn	rs135164815	NCBI
	g.39115345T>C	Exon-4	Chr20: 39115345	T/C		rs136247583	NCBI
MOGAT1	g.111599360A>G	5′ flanking region	Chr2: 111599360	A/G		rs133979911	NCBI
	g.111601747T>A	5′ flanking region	Chr2: 111601747	T/A		rs133346276	NCBI
MINPP1	g.9206582C>T	3′ UTR	Chr26: 9206582	C/T		rs137777224	NCBI
	g.9207070A>G	Intron-5	Chr26: 9207070	A/G		rs42367875	NCBI
CHUK	g.21008688G>T	5′ flanking region	Chr26:21008688	G/T		rs42894462	NCBI
	g.20966385C>G	3′ UTR	Chr26:20966385	C/G		rs381906757	NCBI
	g.20966354C>T	3′ UTR	Chr26:20966354	C/T		rs209464278	NCBI
