# Supplementary material for: Polymorphisms and genetic effects of PRLR, MOGAT1, MINPP1 and CHUK genes on milk fatty acid traits in Chinese Holstein
Source: BMC Genet. 2019 Aug 16;20:69. doi: 10.1186/s12863-019-0769-1 (PMC6698030; doi:10.1186/s12863-019-0769-1)
Supplement: Supplementary file 3 — Table S3. Associations of 11 SNPs of PRLR, MOGAT1, MINPP1 and CHUK genes with fatty acid traits in Chinese Holstein (LSM ± SE). (XLSX 26 kb) [file 12863_2019_769_MOESM3_ESM.xlsx]

## Sheet: Sheet1
Table S3 Associations of 11 SNPs of PRLR, MOGAT1, MINPP1 and CHUK genes with fatty acid traits in Chinese Holstein (LSM±SE).
Gene	SNP	Genotype (No.)	C6:0 (%)	C8:0 (%)	C10:0 (%)	C11:0 (%)	C12:0 (%)	C13:0 (%)	C14:0 (%)	C14:1 (%)	C15:0 (%)	C16:0 (%)	C16:1 (%)	C17:0 (%)
PRLR	g.38948871C>T (rs210259082)	CC（108-119）	0.4838±0.0168AB	0.9744±0.0141	2.7786±0.0414	0.0561±0.0034	2.9409±0.0538	0.0946±0.0043	10.1018±0.0919	0.6340±0.0256	0.9854±0.0177	34.8561±0.2437	1.3268±0.0343	0.5720±0.0044
		CT（399-433）	0.4806±0.0121A	0.9523±0.0108	2.7915±0.0325	0.0589±0.0024	2.9888±0.0417	0.0982±0.0029	10.2456±0.0701	0.6659±0.0184	0.9947±0.0125	34.8788±0.1777	1.3209±0.0249	0.5694±0.0032
		TT（374-404）	0.5144±0.0125B	0.9618±0.0110	2.8333±0.0333	0.0582±0.0024	3.0013±0.0422	0.1002±0.0030	10.2356±0.0716	0.6519±0.0185	0.9908±0.0127	34.5722±0.1820	1.3602±0.0255	0.5670±0.0032
		P	0.0027	0.1605	0.1284	0.6751	0.444	0.4479	0.1822	0.3702	0.8427	0.1106	0.1653	0.4523
	g.38949011G>A (rs379452444)	AA（371-401）	0.4833±0.0125	0.9441±0.0109A	2.8816±0.0329	0.05785±0.0025	3.0355±0.0425	0.1007±0.0030	10.3019±0.0721	0.6484±0.0186	0.9916±0.0127	34.7218±0.1835	1.3532±0.0256	0.5682±0.0032
		AG（397-431）	0.4595±0.0123	0.9195±0.0109B	2.8742±0.0327	0.05885±0.0024	3.0415±0.0421	0.0991±0.0029	10.3250±0.0705	0.6659±0.0185	0.9971±0.0125	34.9952±0.1808	1.3155±0.0253	0.5689±0.0032
		GG（107-120）	0.4641±0.0167	0.9361±0.0140AB	2.8438±0.0413	0.05656±0.0033	2.9856±0.0543	0.0959±0.0043	10.2064±0.0920	0.6314±0.0253	0.9888±0.0176	34.8994±0.2409	1.3258±0.0342	0.5724±0.0044
		P	0.059	0.0108	0.5511	0.7419	0.4754	0.5489	0.3318	0.2865	0.8344	0.195	0.196	0.6043
	g.39115344G>A (rs135164815)	AA（564-604）	0.5238±0.0119A	0.9218±0.0105A	2.7851±0.0320	0.05768±0.0023	3.0140±0.0408	0.0993±0.0028	10.2613±0.0687A	0.6542±0.0175	0.9960±0.0120	34.7866±0.1747	1.3269±0.0244	0.5681±0.0030
		AG（269-295）	0.4867±0.0131B	0.9070±0.0117A	2.7750±0.0342	0.05854±0.0026	2.9922±0.0445	0.0971±0.0032	10.0931±0.0757B	0.6657±0.0198	0.9883±0.0135	34.7398±0.1920	1.3433±0.0270	0.5723±0.0034
		GG（28-34）	0.3904±0.0273C	0.8281±0.0217B	2.6778±0.0624	0.05097±0.0054	2.9551±0.0829	0.0970±0.0073	10.2608±0.1440AB	0.6886±0.0415	1.0028±0.0287	35.0430±0.3855	1.3871±0.0540	0.5633±0.0072
		P	<.0001	<.0001	0.1714	0.3771	0.6378	0.7602	0.0086	0.5913	0.7573	0.7208	0.4232	0.2299
	g.39115345T>C (rs136247583)	CC（572-612）	0.4768±0.0117A	0.9495±0.0104A	2.8660±0.0317a	0.0584±0.0023	3.0040±0.0404	0.0994±0.0027	10.2637±0.0676a	0.6446±0.0173	0.9957±0.0118	34.7716±0.1723	1.3109±0.0241	0.5691±0.0030
		TT（28-35）	0.3758±0.0271Ba	0.8748±0.0213B	2.7263±0.0614b	0.0537±0.0054	2.9450±0.0818	0.0956±0.0072	10.2245±0.1418ab	0.6756±0.0410	1.0026±0.0282	35.0289±0.3806	1.3692±0.0530	0.5622±0.0070
		TC（280-306）	0.4447±0.0131Bb	0.9513±0.0114A	2.8471±0.0338ab	0.0585±0.0025	2.9715±0.0438	0.0976±0.0031	10.1235±0.0748b	0.6543±0.0194	0.9897±0.0133	34.7545±0.1878	1.3291±0.0266	0.5725±0.0034
		P	<.0001	0.0008	0.0456	0.6593	0.4917	0.7458	0.0364	0.6639	0.8264	0.7629	0.4081	0.2421
MOGAT1	g.111599360A>G (rs133979911)	AA（536-581）	0.5105±0.0120	0.9423±0.0106A	2.8576±0.0316	0.0581±0.0034	3.0289±0.0408	0.0985±0.0027	10.2593±0.0686	0.6552±0.0174	0.9984±0.0119	34.8888±0.1716	1.3290±0.0241	0.5675±0.0030
		AG（293-313）	0.4954±0.0129	0.9454±0.0112A	2.8555±0.0340	0.0572±0.0036	2.9948±0.0437	0.0986±0.0032	10.2851±0.0736	0.6494±0.0196	0.9904±0.0133	34.8386±0.1906	1.3286±0.0268	0.5701±0.0034
		GG（37-43）	0.5179±0.0243	0.8665±0.0199B	2.8321±0.0568	0.0570±0.0054	3.0641±0.0748	0.1051±0.0067	10.3900±0.1294	0.6258±0.0372	1.0080±0.0258	34.9222±0.3636	1.4355±0.0490	0.5581±0.0065
		P	0.2816	0.0001	0.8835	0.8975	0.4334	0.5995	0.525	0.6978	0.6909	0.9362	0.0635	0.1582
	g.111601747T>A (rs133346276)	AA（47-53）	0.4772±0.0224	0.8610±0.0187A	2.8853±0.0529	0.0566±0.0050	3.1070±0.0700	0.1031±0.0061	10.3686±0.1182	0.6215±0.0346	0.9967±0.0240	34.6823±0.3315	1.3975±0.0451	0.5617±0.0060
		AT（317-339）	0.4706±0.0129	0.9421±0.0114B	2.8508±0.0340	0.0568±0.0036	2.9906±0.0436	0.0990±0.0031	10.2965±0.0738	0.6429±0.0193	0.9892±0.0132	34.7705±0.1897	1.3118±0.0264	0.5693±0.0034
		TT（494-536）	0.4796±0.0121	0.9305±0.0106B	2.8620±0.0323	0.0577±0.0035	3.0283±0.0413	0.0989±0.0029	10.2793±0.0697	0.6554±0.0179	0.9999±0.0121	34.7994±0.1752	1.3134±0.0247	0.5683±0.0031
		P	0.6725	<.0001	0.7452	0.8733	0.1511	0.7772	0.7053	0.5019	0.6462	0.9259	0.1274	0.4387
MINPP1	g.9206582C>T (rs137777224)	CC（109-117）	0.4076±0.0169A	0.8674±0.0143A	2.7574±0.0421A	0.0571±0.0042	2.9668±0.0544	0.0924±0.0045	10.3215±0.0936	0.6784±0.0263	0.9825±0.0182	35.0248±0.2474	1.3552±0.0346	0.5643±0.0045ab
		CT（412-452）	0.4622±0.0122B	0.9115±0.0108B	2.8380±0.0326AB	0.0587±0.0035	3.0027±0.0414	0.1001±0.0029	10.2921±0.0704	0.6537±0.0182	0.9911±0.0122	34.8373±0.1783	1.3391±0.0250	0.5632±0.0031a
		TT（352-377）	0.5292±0.0125C	0.9543±0.0111C	2.8648±0.0330B	0.0577±0.0035	3.0077±0.0432	0.1002±0.0030	10.2517±0.0721	0.6485±0.0189	0.9980±0.0129	34.5957±0.1834	1.3581±0.0260	0.5709±0.0033b
		P	<.0001	<.0001	0.0132	0.8211	0.6924	0.1913	0.6324	0.5028	0.6573	0.1176	0.645	0.0271
	g.9207070A>G (rs42367875)	AA（605-654）	0.4982±0.0117A	0.9368±0.0104A	2.8533±0.0313Aa	0.0572±0.0034	3.0202±0.0401	0.0999±0.0027	10.2346±0.0676	0.6532±0.0171	0.9988±0.0116	34.7778±0.1694	1.3228±0.0238	0.5715±0.0030a
		GG（19-23）	0.6171±0.0330B	0.9814±0.0256A	2.9714±0.0728ABa	0.0548±0.0067	3.1462±0.0960	0.0963±0.0090	10.5396±0.1671	0.6355±0.0489	0.9884±0.0343	34.6921±0.4582	1.3455±0.0638	0.5473±0.0086b
		GA（244-263）	0.3809±0.0136C	0.8739±0.0117B	2.7747±0.0355Bb	0.0553±0.0037	2.9961±0.0455	0.0972±0.0034	10.2309±0.0783	0.6651±0.0204	0.9983±0.0139	34.9564±0.2007	1.2894±0.0279	0.5669±0.0036ab
		P	<.0001	<.0001	0.0007	0.6566	0.2576	0.6594	0.1539	0.7094	0.9531	0.5123	0.2777	0.0086
CHUK	g.21008688G>T (rs42894462)	GG（314-345）	0.4683±0.0128	0.9495±0.0112A	2.9043±0.0335B	0.0587±0.0025	3.0552±0.0427a	0.1008±0.0031	10.3715±0.0728A	0.6429±0.0191	0.9931±0.0130	34.6921±0.1848	1.3421±0.0258A	0.5629±0.0033A
		GT（418-451）	0.4588±0.0122	0.9164±0.0108B	2.7797±0.0326A	0.0567±0.0024	2.9668±0.0418b	0.09647±0.0029	10.1816±0.0706B	0.6538±0.0182	0.9916±0.0125	34.9189±0.1791	1.3349±0.0250A	0.5719±0.0031B
		TT（148-161）	0.4745±0.0150	1.0011±0.0131C	2.9234±0.0383B	0.0598±0.0031	3.0386±0.0502ab	0.1015±0.0039	10.2204±0.0845AB	0.6843±0.0232	1.0000±0.0160	34.7991±0.2244	1.2249±0.0313B	0.5713±0.0040AB
		P	0.4346	<.0001	<.0001	0.4513	0.0165	0.2479	0.0026	0.184	0.8529	0.3415	<.0001	0.0059
	g.20966385C>G (rs381906757)	CC（206-226）	0.4757±0.0140	0.9493±0.0122A	2.8954±0.0360ABa	0.0576±0.0028	3.0228±0.0468AB	0.1002±0.0036	10.2108±0.0789b	0.6902±0.0214a	0.9916±0.0146	34.8481±0.2067	1.2587±0.0286A	0.5674±0.0037ABb
		GG（223-246）	0.4778±0.0138	0.9429±0.0119AB	2.9091±0.0355Aa	0.0599±0.0027	3.0753±0.0454A	0.1004±0.0034	10.4105±0.0782a	0.6348±0.0206b	0.9948±0.0143	34.6027±0.2008	1.3581±0.0282B	0.5577±0.0036Aa
		GC（450-483）	0.4669±0.0122	0.9210±0.0107B	2.8163±0.0323Bb	0.0561±0.0023	2.9703±0.0412B	0.09671±0.0028	10.2449±0.0699b	0.6509±0.0180ab	0.9921±0.0122	34.8291±0.1763	1.3411±0.0249B	0.5701±0.0031Bb
		P	0.5692	0.0044	0.0004	0.3013	0.0097	0.4222	0.0097	0.0368	0.9732	0.368	0.0007	0.0006
	g.20966354C>T (rs209464278)	CC（359-396）	0.4639±0.0124A	0.9395±0.0109ABa	2.8543±0.0326B	0.0583±0.0024	3.0199±0.0420a	0.09933±0.003	10.3865±0.0718A	0.6465±0.0184	0.9912±0.0126	34.6124±0.1814	1.3407±0.0254a	0.5641±0.0032A
		CT（400-429）	0.5064±0.0124B	0.9154±0.0109Ab	2.7509±0.0329A	0.0558±0.0024	2.9338±0.0423b	0.09692±0.003	10.2052±0.0708B	0.6553±0.0185	0.9946±0.0126	34.8661±0.1800	1.3379±0.0253ab	0.5730±0.0032B
		TT（122-132）	0.5076±0.0159B	0.9700±0.0137Bc	2.8955±0.0405B	0.0605±0.0032	3.0162±0.0521ab	0.1009±0.0042	10.2414±0.0880AB	0.6714±0.0247	1.0063±0.0170	34.9988±0.2352	1.2676±0.0329b	0.5726±0.0043AB
		P	<.0001	<.0001	<.0001	0.2385	0.0146	0.558	0.0033	0.5682	0.6615	0.1211	0.0389	0.005
Gene	SNP	Genotype (No.)	C17:1 (%)	C18:0 (%)	C18:1cis-9 (%)	C18index (%)	C20:0 (%)	C14index (%)	C16index (%)	C17index (%)	SFA (%)	UFA (%)	SFA/UFA (%)
PRLR	g.38948871C>T (rs210259082)	CC（89-119）	0.1955±0.0034	14.1717±0.1276	19.1580±0.1700	57.3145±0.3827	0.1665±0.0026	6.0325±0.1907	3.6101±0.0875	25.3761±0.2955	67.6998±0.2299	30.7335±0.2116a	2.2541±0.0305
		CT（353-434）	0.1894±0.0025	14.0264±0.0889	18.8372±0.1182	57.0411±0.2761	0.1716±0.0017	6.2843±0.1414	3.5941±0.0644	25.0175±0.2196	68.2172±0.1641	30.2132±0.1483b	2.2955±0.0215
		TT（348-404）	0.1889±0.0025	14.1691±0.0904	19.0340±0.1213	57.1193±0.2795	0.1693±0.0017	6.0994±0.1429	3.7109±0.0650	25.0739±0.2237	68.0919±0.1665	30.3329±0.1509ab	2.2748±0.0220
		P	0.0996	0.1927	0.0717	0.7478	0.0818	0.1781	0.079	0.3994	0.0623	0.0364	0.3015
	g.38949011G>A (rs379452444)	AA（345-401）	0.1902±0.0026	14.1808±0.0904	19.1093±0.1221	57.2462±0.2825	0.1683±0.0017	6.0717±0.1436	3.7294±0.066	24.9817±0.2268	67.9902±0.1679	30.2900±0.1526	2.2793±0.0222
		AG（351-432）	0.1905±0.0025	14.0422±0.0888	18.9777±0.1187	57.3876±0.2785	0.1704±0.0018	6.2413±0.1410	3.6057±0.0650	24.9458±0.2204	68.0620±0.1652	30.2807±0.1499	2.2969±0.0216
		GG（89-120）	0.1958±0.0034	14.1656±0.1281	19.3729±0.1700	57.6890±0.3834	0.1668±0.0026	6.0844±0.1922	3.6356±0.0875	25.1500±0.2942	67.5613±0.2304	30.6927±0.2112	2.2500±0.0306
		P	0.1805	0.2315	0.0511	0.4856	0.2162	0.3253	0.0639	0.7444	0.0741	0.1094	0.2599
	g.39115344G>A (rs135164815)	AA（514-606）	0.1913±0.0024a	14.0676±0.0852	19.1030±0.1133	57.0876±0.2656	0.1693±0.0016	6.0848±0.1363	3.6173±0.0625	24.5662±0.2145A	68.1720±0.1580Aa	30.2985±0.1438a	2.2939±0.0208
		AG（243-296）	0.1972±0.0027b	14.1382±0.0957	19.2433±0.1297	57.1382±0.2994	0.1705±0.0019	6.2290±0.1530	3.6726±0.0694	25.2673±0.2345B	67.7637±0.1779ABb	30.6363±0.1624ab	2.2652±0.0236
		GG（22-34）	0.1965±0.0055ab	13.6970±0.2118	19.6713±0.2815	58.5030±0.6270	0.1647±0.0044	6.5258±0.3101	3.7405±0.1359	25.4821±0.4674AB	67.0830±0.3787Bb	31.2157±0.344b	2.2108±0.0500
		P	0.022	0.1134	0.0791	0.0666	0.3762	0.1966	0.4288	0.0003	0.0011	0.0033	0.1211
	g.39115345T>C (rs136247583)	CC（517-614）	0.1879±0.0024	14.0782±0.0835	19.0200±0.1121	57.2655±0.2636a	0.1689±0.0016	6.1170±0.1341	3.5998±0.0617	24.5184±0.2109A	68.0597±0.1565Aa	30.1805±0.1413A	2.2932±0.0204
		TT（22-35）	0.1938±0.0054	13.7095±0.2085	19.6664±0.2797	58.8881±0.6132b	0.1641±0.0044	6.7414±0.3016	3.7259±0.1346	25.2617±0.4589AB	66.9251±0.3705Bb	31.2328±0.3406B	2.1865±0.0496
		TC（249-307）	0.1924±0.0026	14.1502±0.0947	19.0881±0.1261	57.3983±0.2931a	0.1695±0.0018	6.2553±0.1511	3.6542±0.0678	25.1099±0.2313B	67.6622±0.1746ABb	30.5011±0.1584AB	2.2651±0.0230
		P	0.0798	0.1063	0.0594	0.0257	0.4689	0.0689	0.4226	0.0031	0.0008	0.0014	0.0508
MOGAT1	g.111599360A>G (rs133979911)	AA（470-583）	0.1903±0.0024	13.9936±0.0842a	19.0788±0.1134	57.3646±0.2642	0.1697±0.0016	6.2000±0.1361	3.6630±0.0618	24.9040±0.2127	68.0611±0.1568	30.3462±0.1418	2.2857±0.0207
		AG（263-313）	0.1942±0.0027	14.2362±0.0942b	19.0712±0.1271	57.0214±0.2942	0.1686±0.0018	6.1007±0.1492	3.6515±0.0686	25.2968±0.2311	68.1041±0.1751	30.2201±0.1594	2.2972±0.0230
		GG（37-43）	0.1962±0.0048	13.8033±0.1894ab	18.6695±0.2530	57.3963±0.5632	0.1749±0.0035	5.7952±0.2764	3.9082±0.1244	25.8106±0.4248	68.2652±0.3419	30.0408±0.3129	2.3014±0.0457
		P	0.1135	0.0058	0.2473	0.371	0.1945	0.2567	0.0926	0.0153	0.8145	0.4559	0.8229
	g.111601747T>A (rs133346276)	AA（45-53）	0.1901±0.0045	14.0026±0.1751	18.7715±0.2333	57.1299±0.5208	0.1733±0.0032	5.8283±0.2519	3.8365±0.1145	25.1980±0.3848	68.2441±0.3140	30.2331±0.2875	2.3018±0.0418
		AT（284-338）	0.1922±0.0026	14.2350±0.0935	19.0571±0.1262	57.1403±0.2915	0.1669±0.0018	6.1014±0.1491	3.5908±0.0681	25.1171±0.2319	68.0685±0.1732	30.2452±0.1584	2.2863±0.0229
		TT（434-539）	0.1901±0.0024	14.0582±0.0861	19.1093±0.1154	57.4655±0.2689	0.1691±0.0017	6.3057±0.1378	3.6182±0.0630	24.8163±0.2162	67.9809±0.1596	30.4040±0.1451	2.2716±0.0211
		P	0.5884	0.0861	0.3339	0.3939	0.0974	0.0578	0.0803	0.1997	0.6334	0.4848	0.6464
MINPP1	g.9206582C>T (rs137777224)	CC（89-117）	0.1915±0.0035	14.2467±0.1310	19.2603±0.1735	57.3933±0.3925	0.1669±0.0025	6.4936±0.1958	3.7192±0.0883	25.1085±0.2997	67.9079±0.2357	30.4560±0.2176	2.2556±0.0314
		CT（373-454）	0.1920±0.0025	14.1083±0.0875	19.0931±0.1170	57.1342±0.2719	0.1698±0.0017	6.1952±0.1398	3.6793±0.0642	24.9883±0.2187	68.1328±0.1623	30.2940±0.1468	2.2898±0.0214
		TT（316-377）	0.1933±0.0026	14.0694±0.0920	19.1137±0.1239	57.1686±0.2861	0.1727±0.0017	6.1039±0.1456	3.7420±0.0664	25.2893±0.2268	67.9324±0.1693	30.4520±0.1543	2.2630±0.0222
		P	0.7784	0.4029	0.604	0.78	0.0436	0.107	0.4964	0.263	0.3358	0.4652	0.2978
	g.9207070A>G (rs42367875)	AA（543-655）	0.1938±0.0024	14.0572±0.0821	19.1851±0.1107	57.3730±0.2586	0.1697±0.0016	6.1614±0.1346	3.6312±0.0614	25.1867±0.2088	67.9463±0.1532	30.4602±0.1391	2.2817±0.0201
		GG（14-23）	0.1850±0.0064	13.8739±0.2546	19.2674±0.3357	58.1993±0.7448	0.1636±0.0055	6.0751±0.3567	3.7290±0.1615	24.9941±0.5473	67.9509±0.4506	30.5482±0.4130	2.2861±0.0560
		GA（215-264）	0.1915±0.0028	14.0641±0.1003	19.0881±0.1351	57.0927±0.3125	0.1700±0.0020	6.2324±0.1569	3.5513±0.0712	25.0463±0.2410	68.0374±0.1856	30.3342±0.1695	2.2860±0.0246
		P	0.2635	0.7536	0.6789	0.2493	0.5099	0.8106	0.2624	0.7401	0.848	0.6558	0.9789
CHUK	g.21008688G>T (rs42894462)	GG（278-345）	0.1910±0.0026ab	13.8977±0.0924A	19.1730±0.1239	57.7468±0.2849Aa	0.1677±0.0018b	6.0155±0.1469	3.7028±0.0668A	25.2532±0.2288A	67.9243±0.1695	30.4372±0.1540A	2.2669±0.0225
		GT（376-452）	0.1936±0.0025a	14.2342±0.0889B	19.1074±0.1183	57.0123±0.2748ABb	0.1724±0.0017a	6.1801±0.1412	3.6737±0.0645A	25.1230±0.2195A	68.0493±0.1633	30.2887±0.1495AB	2.2740±0.0216
		TT（135-161）	0.1868±0.0032b	14.2892±0.1150B	18.8793±0.1545	56.6415±0.3523Bb	0.1669±0.0022b	6.3861±0.1739	3.3777±0.0795B	24.3623±0.2726B	68.4029±0.2113	29.8584±0.1930B	2.3268±0.0281
		P	0.0423	0.0001	0.1551	0.0014	0.0029	0.0693	<.0001	0.001	0.0674	0.0099	0.0762
	g.20966385C>G (rs381906757)	CC（191-226）	0.1878±0.0029a	14.1904±0.1049A	19.1084±0.1410	57.1738±0.3223	0.1660±0.0020	6.4548±0.1625A	3.4339±0.0734A	24.2874±0.2501Aa	68.0226±0.1924	30.1959±0.1751	2.2990±0.0256
		GG（193-246）	0.1925±0.0028ab	13.7773±0.1023B	19.1618±0.1359	57.9065±0.3131	0.1690±0.0020	5.7567±0.1599B	3.7268±0.0719B	24.9685±0.2453ABb	67.8492±0.1873	30.4611±0.1693	2.2766±0.0248
		GC（403-482）	0.1941±0.0025b	14.1519±0.0861A	19.1655±0.1171	57.3157±0.2707	0.1695±0.0017	5.9992±0.1383B	3.6652±0.0639B	24.9813±0.2170Bb	67.8657±0.1607	30.4411±0.1473	2.2717±0.0211
		P	0.0361	0.0001	0.9046	0.055	0.1472	<.0001	<.0001	0.0027	0.6252	0.2594	0.5009
	g.20966354C>T (rs209464278)	CC（323-397）	0.1915±0.0025a	13.8369±0.0891A	19.2824±0.1211A	57.9829±0.2802A	0.1671±0.0017a	5.9832±0.1456	3.6678±0.0657Aa	24.9481±0.2221Aa	67.7522±0.1664Aa	30.6564±0.1508A	2.2603±0.0218A
		CT（354-430）	0.1920±0.0025a	14.2265±0.0893B	19.1341±0.1194A	57.0544±0.2770B	0.1717±0.0017b	6.2201±0.1400	3.6315±0.0644ABa	24.7856±0.2218ABa	68.0185±0.1648ABa	30.3852±0.1498A	2.2810±0.0217A
		TT（113-132）	0.1842±0.0033b	14.3499±0.1239B	18.5591±0.1642B	56.2933±0.3733B	0.1680±0.0023ab	6.2587±0.1841	3.4254±0.0837Bb	24.0707±0.2857Bb	68.5576±0.2239Bb	29.6946±0.2040B	2.3650±0.0297B
		P	0.0273	<.0001	<.0001	<.0001	0.0114	0.0959	0.0058	0.0036	0.0011	<.0001	0.0014
Note: P referred to the significances of the association analysis between each SNP and milk fatty acid traits. P < 0.05 indicated significant. P < 0.01 indicated highly significant. a,b within a column with no common superscript letters referred to P < 0.05. A,B,C within a column with no common superscript letters referred to P < 0.01. The comment or no superscript indicated no significant. The n…
