# Supplementary material for: Polymorphisms and genetic effects of PRLR, MOGAT1, MINPP1 and CHUK genes on milk fatty acid traits in Chinese Holstein
Source: BMC Genet. 2019 Aug 16;20:69. doi: 10.1186/s12863-019-0769-1 (PMC6698030; doi:10.1186/s12863-019-0769-1)
Supplement: Supplementary file 4 — Table S4. Additive (a), dominant (d), and allele substitution (α) effects of 11 SNPs on milk fatty acid traits in Chinese Holstein cows. (XLSX 18 kb) [file 12863_2019_769_MOESM4_ESM.xlsx]

## Sheet: Sheet1
Table S4 Additive (a), dominant (d), and allele substitution (α) effects of 11 SNPs on milk fatty acid traits
Genes	SNPs	Genotype	C6:0	C8:0	C10:0	C11:0	C12:0	C13:0	C14:0	C14:1	C15:0	C16:0	C16:1	C17:0
PRLR	rs210259082	a	-0.0153*	0.0063	-0.0273	-0.001	-0.0302	-0.0028	-0.0669	-0.009	-0.0027	0.142	-0.0167	0.0025
		d	-0.0185	-0.0158	-0.0144	0.0018	0.0177	0.0008	0.0769	0.0229	0.0066	0.1647	-0.0226	0
		α	-0.0209**	0.0015	-0.0317	-0.0005	-0.0248	-0.0025	-0.0433	-0.0022	-0.0007	0.1906	-0.0235	0.0025
	rs379452444	a	0.0096	0.004	0.0189	0.0006	0.025	0.0024	0.0478	0.0085	0.0014	-0.0888	0.0137	-0.0021
		d	-0.0142	-0.0207*	0.0115	0.0017	0.031	0.0007	0.0708	0.026	0.0069	0.1847	-0.024	-0.0014
		α	0.0139	0.0102	0.0155	0.0002	0.0157	0.0022	0.0262	0.0008	-0.0006	-0.1426	0.0208	-0.0017
	rs135164815	a	0.0667**	0.0469**	0.0536	0.0034	0.0295	0.0012	0.0002	-0.0172	-0.0034	-0.1282	-0.0301	0.0024
		d	0.0296	0.0321**	0.0435	0.0042	0.0076	-0.001	-0.168*	-0.0057	-0.0112	-0.1749	-0.0138	0.0066
		α	0.0483**	0.0272**	0.027	0.0008	0.0248	0.0018	0.1048*	-0.0137	0.0034	-0.022	-0.0217	-0.0016
	rs136247583	a	0.0161**	-0.0009	0.0095	-0.0001	0.0162	0.0009	0.0701*	-0.0048	0.003	0.0085	-0.0091	-0.0017
		d	-0.085**	-0.0756**	-0.1302*	-0.0047	-0.0428	-0.0029	0.0309	0.0261	0.01	0.2658	0.0492	-0.0086
		α	-0.0365*	-0.0469**	-0.0694	-0.003	-0.0098	-0.0008	0.0891	0.011	0.009	0.1683	0.0206	-0.0069
MOGAT1	rs133979911	a	-0.0037	0.0379**	0.0128	0.0005	-0.0176	-0.0033	-0.0653	0.0147	-0.0048	-0.0167	-0.0533*	0.0047
		d	-0.0188	0.0411**	0.0107	-0.0004	-0.0517	-0.0033	-0.0396	0.0089	-0.0128	-0.0669	-0.0536	0.0073
		α	0.0071	0.0143*	0.0066	0.0007	0.012	-0.0014	-0.0427	0.0096	0.0025	0.0221	-0.0224	0.0005
	rs133346276	a	-0.0012	-0.0348**	0.0117	-0.0006	0.0394	0.0021	0.0447	-0.017	-0.0016	-0.0586	0.0421*	-0.0033
		d	-0.0078	0.0464**	-0.0228	-0.0004	-0.077	-0.0021	-0.0274	0.0044	-0.0091	0.0297	-0.0436	0.0043
		α	-0.0053	-0.0104	-0.0002	-0.0008	-0.0006	0.001	0.0305	-0.0146	-0.0063	-0.0429	0.0194	-0.0011
MINPP1	rs137777224	a	-0.0608**	-0.0434**	-0.0537**	-0.0003	-0.0205	-0.0039	0.0349	0.015	-0.0077	0.2146	-0.0015	-0.0033
		d	-0.0062	0.0006	0.0269	0.0013	0.0154	0.0038	0.0055	-0.0097	0.0008	0.0271	-0.0176	-0.0043
		α	-0.0625**	-0.0433**	-0.0463**	0.0001	-0.0162	-0.0029	0.0364	0.0123	-0.0075	0.222*	-0.0063	-0.0045*
	rs42367875	a	0.0587**	0.0314**	0.0393**	0.0009	0.0121	0.0014	0.0019	-0.006	0.0002	-0.0893	0.0167	0.0023
		d	0.1776**	0.076**	0.1574*	-0.0014	0.138	-0.0023	0.3069	-0.0236	-0.0102	-0.175	0.0394	-0.0219**
		α	0.1785**	0.0825**	0.1449**	0	0.1046	-0.0002	0.2089	-0.0218	-0.0066	-0.2072	0.0431	-0.0124*
CHUK	rs42894462	a	-0.0031	-0.0258**	-0.0096	-0.0006	0.0083	-0.0004	0.0756*	-0.0207	-0.0034	-0.0535	0.0586**	-0.0042*
		d	-0.0126	-0.0589**	-0.1342**	-0.0026	-0.0801**	-0.0047	-0.1143*	-0.0097	-0.0049	0.1733	0.0514*	0.0048
		α	-0.0007	-0.0142*	0.0163	-0.0001	0.0241	0.0005	0.0969**	-0.0189	-0.0025	-0.0871	0.0489**	-0.0051**
	rs381906757	a	0.0044	0.0141**	0.0396**	0.0008	0.0262	0.0018	-0.0171	0.0196*	-0.0003	0.0095	-0.0412**	-0.0013
		d	0.0065	0.0078	0.0532*	0.003	0.0788*	0.0019	0.1827**	-0.0357*	0.0029	-0.2359	0.0582*	-0.011**
		α	0.0043	0.0139**	0.0384**	0.0007	0.0242	0.0017	-0.0194	0.0204*	-0.0003	0.0145	-0.0422**	-0.0011
	rs209464278	a	-0.0219**	-0.0153*	-0.0206	-0.0011	0.0018	-0.0008	0.0726	-0.0125	-0.0075	-0.1932	0.0366*	-0.0043*
		d	0.0207*	-0.0393**	-0.124**	-0.0036	-0.0843**	-0.0032	-0.1088*	-0.0037	-0.0041	0.0605	0.0338	0.0047
		α	-0.0274**	-0.0042	0.0136	-0.0002	0.0254	0.0001	0.102**	-0.0115	-0.0064	-0.21*	0.0274	-0.0056**
Genes	SNPs	Genotype	C17:1	C18:0	C18:1cis-9	C18index	C20:0	C14index	C16index	C17index	SFA	UFA	SFA/UFA
PRLR	rs210259082	a	0.0033*	0.0013	0.062	0.0976	-0.0014	-0.0334	-0.0504	0.1511	-0.196	0.2003	-0.0104
		d	-0.0028	-0.144	-0.2588*	-0.1758	0.0036*	0.2183	-0.0665	-0.2075	0.3214*	-0.32*	0.031
		α	0.0025	-0.0411	-0.0148	0.1498	-0.0002	0.0338	-0.0703	0.0885	-0.1005	0.105	-0.0012
	rs379452444	a	-0.0028	0.0076	-0.1318	-0.2214	0.0008	-0.0063	0.0469	-0.0841	0.2145	-0.2013	0.0147
		d	-0.0025	-0.131	-0.2634*	-0.08	0.0029	0.1632	-0.0768	-0.1201	0.2863	-0.2107	0.0322
		α	-0.0021	0.0458	-0.0545	-0.2449	-0.0002	-0.0561	0.0696	-0.0483	0.1302	-0.1392	0.0053
	rs135164815	a	-0.0026	0.1853	-0.2841*	-0.7077*	0.0023	-0.2205	-0.0616	-0.4579*	0.5445**	-0.4586**	0.0416
		d	0.0033	0.2559*	-0.1438	-0.657	0.0035	-0.0763	-0.0063	0.2432	0.1362	-0.1209	0.0128
		α	-0.0046*	0.0291	-0.1963*	-1.1089*	0	-0.173	-0.0577	-0.6072**	0.4613**	-0.3848**	0.0338*
	rs136247583	a	-0.0023*	-0.036	-0.0341	-0.0664	-0.0003	-0.0691	-0.0272	-0.2957**	0.1988**	-0.1603*	0.0141
		d	0.0037	-0.4047*	0.6124*	1.5562**	-0.0051	0.5552	0.0989	0.4475	-0.9359**	0.892**	-0.0927
		α	0	-0.2808*	0.3363	0.8755*	-0.0035	0.2729	0.0326	-0.0236	-0.3673	0.3798	-0.0417
MOGAT1	rs133979911	a	-0.0029	0.0952	0.2046	-0.0158	-0.0026	0.2024	-0.1226*	-0.4533*	-0.102	0.1527	-0.0079
		d	0.001	0.3378**	0.197	-0.3591	-0.0037	0.1031	-0.1341	-0.0606	-0.0591	0.0266	0.0037
		α	-0.0035*	-0.2107**	0.0912	-0.2223	-0.0005	0.1433	-0.0455	-0.4185**	-0.0681	0.1374	-0.01
	rs133346276	a	0	-0.0278	-0.1689	-0.1678	0.0021	-0.2387*	0.1091*	0.1909	0.1316	-0.0855	0.0151
		d	0.0022	0.2046	0.1167	-0.1573	-0.0043*	0.0345	-0.1366*	0.11	-0.044	-0.0734	-0.0004
		α	0.0011	0.0137	-0.1078	-0.0856	-0.0001	-0.2208*	0.038	0.2482	0.1086	-0.1238	0.0149
MINPP1	rs137777224	a	-0.0009	0.0887	0.0733	0.1124	-0.0029*	0.1948*	-0.0114	-0.0904	-0.0122	0.002	-0.0037
		d	-0.0004	-0.0497	-0.0939	-0.1468	0.0001	-0.1036	-0.0513	-0.2106	0.2126	-0.1601	0.0305
		α	-0.001	0.088	0.0475	0.1527	-0.0029*	0.1663	-0.0254	-0.1475	0.0462	-0.0424	0.0046
	rs42367875	a	0.0012	-0.0034	0.0485	0.1401	-0.0001	-0.0355	0.0399	0.0702	-0.0455	0.063	-0.0022
		d	-0.0076	-0.1867	0.1307	0.9665	-0.0063	-0.1218	0.1378	-0.1224	-0.0409	0.1509	0.0022
		α	-0.0039	-0.0616	0.1362	0.7892	-0.0044	-0.1176	0.1321	-0.0115	-0.073	0.1642	-0.0007
CHUK	rs42894462	a	0.0021	-0.1958**	0.1469	0.5526**	0.0004	-0.1853*	0.1625**	0.4455**	-0.2393*	0.2894**	-0.03*
		d	0.0047*	0.1408	0.0813	-0.1818	0.0051**	-0.0207	0.1335**	0.3153	-0.1142	0.1409	-0.0228
		α	0.0012	-0.2228**	0.1313	0.5177**	-0.0005	-0.1815*	0.1375**	0.3862**	-0.2174*	0.2621**	-0.0256
	rs381906757	a	-0.0032*	0.0193	-0.0285	-0.0709	-0.0018	0.2278**	-0.1157**	-0.3469**	0.0785	-0.1226	0.0136
		d	0.0016	-0.3939**	0.0249	0.6618*	0.0012	-0.4703**	0.1773**	0.3341	-0.0949	0.1427	-0.0087
		α	-0.0032*	0.0272	-0.029	-0.0848	-0.0018	0.2333**	-0.1183**	-0.352**	0.0804	-0.1258	0.0138
	rs209464278	a	0.0037*	-0.2565**	0.3617**	0.8448**	-0.0005	-0.1378	0.1212**	0.4387**	-0.4027**	0.4809**	-0.0523**
		d	0.0041*	0.1331	0.2134	-0.0837	0.0042**	0.0992	0.0849	0.2762	-0.1364	0.2098	-0.0317
		α	0.0025	-0.2934**	0.303**	0.8216**	-0.0016	-0.1642*	0.0982**	0.3638**	-0.3651**	0.4228**	-0.0435**
Note: * referred significant (P < 0.05), ** referred highly significant (P < 0.01).
