# Supplementary material for: Polymorphisms and genetic effects of PRLR, MOGAT1, MINPP1 and CHUK genes on milk fatty acid traits in Chinese Holstein
Source: BMC Genet. 2019 Aug 16;20:69. doi: 10.1186/s12863-019-0769-1 (PMC6698030; doi:10.1186/s12863-019-0769-1)
Supplement: Supplementary file 5 — Table S5. Associations of the haplotype blocks with milk fatty acid traits in Chinese Holstein (LSM ± SE). (XLSX 19 kb) [file 12863_2019_769_MOESM5_ESM.xlsx]

## Sheet: Sheet1
Table S5 Associations of the haplotype blocks with milk fatty acid traits in Chinese Holstein (LSM±SE).
Haplotype block	Haplotype combination (No.)	C6:0 (%)	C8:0 (%)	C10:0 (%)	C11:0 (%)	C12:0 (%)	C13:0 (%)	C14:0 (%)	C14:1 (%)	C15:0 (%)	C16:0 (%)	C16:1 (%)	C17:0 (%)
(PRLR) Block1	H1H1（377-406）	0.4615±0.0123a	0.9517±0.0111	2.8642±0.0327	0.0587±0.0024	3.0497±0.0420	0.1005±0.0030	10.2199±0.0709	0.6524±0.0184	0.9917±0.0126	34.6959±0.1807	1.3315±0.0252	0.5640±0.0032
	H1H2（399-431）	0.4358±0.0122b	0.9422±0.0109	2.8259±0.0326	0.0596±0.0024	3.0437±0.0421	0.0987±0.0029	10.2300±0.0710	0.6714±0.0186	0.9955±0.0124	34.9443±0.1812	1.3079±0.0253	0.5658±0.0032
	H2H2（110-123）	0.4445±0.0166ab	0.9646±0.014	2.8322±0.0405	0.0568±0.0033	3.0156±0.0540	0.0954±0.0043	10.1213±0.0917	0.6356±0.0253	0.9857±0.0174	34.8320±0.2411	1.2927±0.0342	0.5679±0.0044
	P	0.0389	0.1492	0.248	0.6544	0.7674	0.4936	0.3744	0.2436	0.8294	0.2587	0.357	0.6059
(PRLR) Block2	H1H1（578-617）	0.4910±0.0120A	0.9265±0.0106	2.8328±0.0322	0.0583±0.0023	3.0126±0.0410	0.1004±0.0028	10.3729±0.0687A	0.6462±0.0177	0.9991±0.0120	34.8177±0.1739	1.3205±0.0245	0.5667±0.0031
	H1H2（279-305）	0.4551±0.0131B	0.9288±0.0115	2.8161±0.0344	0.0585±0.0026	2.9892±0.0441	0.0986±0.0032	10.2023±0.0756B	0.6580±0.0197	0.9917±0.0135	34.7978±0.1921	1.3401±0.0267	0.5713±0.0034
	P	0.0005	0.7868	0.4821	0.917	0.4642	0.5651	0.0018	0.4793	0.5266	0.8967	0.361	0.1178
(MOGAT1) Block3	H1H1（512-555）	0.4592±0.0121	0.9126±0.0107A	2.8183±0.0323	0.0583±0.0035	3.0357±0.0410	0.0990±0.0028	10.2591±0.0696	0.6617±0.0178	0.9987±0.0120	34.7488±0.1754	1.3203±0.0244a	0.5673±0.0031
	H1H2（296-317）	0.4512±0.0129	0.9321±0.0114A	2.8130±0.0344	0.0577±0.0036	3.0119±0.0446	0.0992±0.0032	10.2637±0.0747	0.6504±0.0197	0.9875±0.0134	34.7219±0.1915	1.3260±0.0270ab	0.5693±0.0034
	H2H2（38-44）	0.4784±0.0245	0.8488±0.0198B	2.8181±0.0561	0.0579±0.0053	3.0830±0.0742	0.1047±0.0066	10.3786±0.1273	0.6437±0.0370	1.0053±0.0257	34.9320±0.3587	1.4381±0.0484b	0.5562±0.0064
	P	0.4553	<.0001	0.9745	0.9491	0.5306	0.6802	0.5931	0.7357	0.5676	0.8343	0.0364	0.1209
(MINPP1) Block4	H1H1（356-381）	0.5058±0.0128A	0.9843±0.0112Aa	2.8511±0.0334A	0.0581±0.0036	2.9860±0.0429	0.1002±0.0031	10.2107±0.0728	0.6540±0.0191	1.0005±0.0130	34.6410±0.1840	1.3599±0.0257	0.5718±0.0033
	H1H2（224-247）	0.4602±0.0137B	0.9453±0.0121Bbd	2.8465±0.0359A	0.0587±0.0037	2.9745±0.0463	0.1007±0.0034	10.2106±0.0770	0.6528±0.0210	0.9865±0.0144	34.8590±0.2019	1.3483±0.0286	0.5652±0.0036
	H1H3（193-210）	0.3833±0.0144C	0.9141±0.0123Bbd	2.8068±0.0370AB	0.0580±0.0038	3.0027±0.0476	0.0999±0.0036	10.2456±0.0808	0.6571±0.0216	0.9988±0.0149	34.8978±0.2114	1.3155±0.0293	0.5641±0.0037
	H2H2（39-41）	0.4444±0.0246ABC	0.8990±0.0205Bcd	2.7374±0.0594AB	0.0614±0.0056	3.0096±0.0786	0.0963±0.0069	10.4672±0.1338	0.6693±0.0400	0.9900±0.0272	35.2265±0.3692	1.3630±0.0514	0.5701±0.0068
	H2H3（51-56）	0.2641±0.0224D	0.8395±0.0187Cc	2.6618±0.0537B	0.0545±0.0051	2.8476±0.0706	0.0883±0.0064	10.0241±0.1238	0.6991±0.0354	0.9732±0.0245	34.9120±0.3272	1.3603±0.0462	0.5669±0.0061
	P	<.0001	<.0001	0.0008	0.8346	0.246	0.4071	0.0926	0.7523	0.7115	0.3671	0.5362	0.1779
(CHUK) Block5	H1H1（223-246）	0.4736±0.0135A	0.9519±0.0121AC	2.9354±0.0354Aa	0.0600±0.0027	3.0791±0.0456a	0.1005±0.0034	10.4860±0.0786A	0.6303±0.0208	0.9943±0.0141	34.6575±0.2006	1.3615±0.0282a	0.5561±0.0036Aa
	H1H2（330-351）	0.4623±0.0129A	0.9179±0.0112BD	2.7993±0.0336Bb	0.0570±0.0025	2.9690±0.0433b	0.0969±0.0031	10.2647±0.0729B	0.6404±0.0192	0.9943±0.0132	34.9301±0.1863	1.3507±0.0260a	0.5714±0.0033Bb
	H1H3（125-137）	0.4096±0.0162B	0.9416±0.0138CDE	2.8888±0.0403ABab	0.0575±0.0032	2.9988±0.0524ab	0.0985±0.0041	10.2629±0.0893AB	0.6668±0.0248	0.9896±0.0169	34.7056±0.2369	1.3245±0.0332ab	0.5679±0.0043ABab
	H2H2（122-131）	0.4755±0.0161A	0.9774±0.0139AE	2.9351±0.0405ACa	0.0609±0.0032	3.0303±0.0527ab	0.1012±0.0043	10.3056±0.0887AB	0.6693±0.0249	1.0043±0.0171	34.9968±0.2389	1.2574±0.0333b	0.5705±0.0043Ab
	H2H3（73-82）	0.4856±0.0195A	0.9149±0.0161BC	2.7866±0.0472BCb	0.0567±0.0039	3.0090±0.0622ab	0.0984±0.0052	10.1324±0.1061B	0.7108±0.0303	0.9817±0.0209	34.7854±0.2827	1.2793±0.0394ab	0.5667±0.0052ABab
	P	0.0003	<.0001	<.0001	0.6183	0.0649	0.8182	0.0014	0.0628	0.8979	0.4871	0.0076	0.0002
Haplotype block	Haplotype combination (No.)	C17:1 (%)	C18:0 (%)	C18:1cis-9 (%)	C18index (%)	C20:0 (%)	C14index (%)	C16index (%)	C17index (%)	SFA (%)	UFA (%)	SFA/UFA (%)
(PRLR) Block1	H1H1（347-406）	0.1915±0.0025	14.0875±0.0902	19.0981±0.1214	57.2615±0.2775	0.1693±0.0017	6.1338±0.1421	3.6916±0.0654	24.8777±0.2233	67.9271±0.1651	30.3022±0.1516	2.2642±0.0220
	H1H2（351-432）	0.1918±0.0025	13.9702±0.0882	18.9497±0.1187	57.3405±0.2784	0.1710±0.0017	6.2971±0.1415	3.6053±0.0647	24.8301±0.2189	68.0106±0.1652	30.2576±0.1487	2.2848±0.0216
	H2H2（91-123）	0.1962±0.0034	14.1247±0.1256	19.2736±0.1713	57.6677±0.3850	0.1670±0.0025	6.0426±0.1912	3.5778±0.0861	25.0495±0.2940	67.4996±0.2309	30.6602±0.2098	2.2472±0.0301
	P	0.3072	0.2626	0.1085	0.5441	0.1993	0.2095	0.177	0.708	0.0653	0.1248	0.3456
(PRLR) Block2	H1H1（520-619）	0.1881±0.0024A	14.0815±0.0848	19.0999±0.1141	57.2905±0.2668	0.1692±0.0016	6.0231±0.1360	3.6278±0.0632	24.6625±0.2139A	68.1801±0.1579A	30.2179±0.1432a	2.2900±0.0208
	H1H2（246-306）	0.1943±0.0027B	14.1651±0.0961	19.2013±0.1281	57.3218±0.2952	0.1704±0.0018	6.2090±0.1521	3.6802±0.0686	25.3736±0.2358B	67.7844±0.1760B	30.5075±0.1605b	2.2623±0.0233
	P	0.0042	0.3329	0.3764	0.9013	0.4455	0.1234	0.3322	0.0001	0.0099	0.0392	0.1737
(MOGAT1) Block3	H1H1（450-558）	0.1906±0.0025	14.0048±0.0856a	19.1785±0.1147	57.3712±0.2673	0.1701±0.0017	6.2083±0.1391	3.6478±0.0629	24.7092±0.2140	67.9228±0.1591	30.4968±0.1434	2.2718±0.0209
	H1H2（267-317）	0.1940±0.0027	14.2531±0.0951b	19.0924±0.1287	56.9793±0.2954	0.1700±0.0018	6.0586±0.1505	3.6219±0.0691	25.1272±0.2349	68.0728±0.1758	30.2884±0.1615	2.2928±0.0233
	H2H2（38-44）	0.1956±0.0048	13.8070±0.1889ab	18.7046±0.2529	57.1473±0.5661	0.1744±0.0035	5.7565±0.2713	3.9014±0.1229	25.6288±0.4124	68.3278±0.3407	30.1916±0.3113	2.3059±0.0455
	P	0.1996	0.0045	0.1434	0.2917	0.4286	0.1378	0.06	0.011	0.3475	0.2476	0.4915
(MINPP1) Block4	H1H1（320-381）	0.1923±0.0026	14.0233±0.0927	19.1045±0.1229ABab	57.4874±0.2851	0.1725±0.0018A	6.1016±0.1451	3.7371±0.0666	25.0131±0.2274	67.9025±0.1699	30.5124±0.1530ab	2.2712±0.0226
	H1H2（205-248）	0.1908±0.0028	14.0950±0.1021	19.2326±0.1371Ab	57.6338±0.3153	0.1661±0.0020B	6.1694±0.1580	3.7035±0.0728	24.9881±0.2464	67.9616±0.1883	30.5659±0.1723ab	2.2910±0.0249
	H1H3（172-211）	0.1880±0.0029	14.0328±0.1079	18.8053±0.1446a	57.0697±0.3288	0.1695±0.0021AB	6.0840±0.1680	3.6136±0.0743	24.5962±0.2543	68.2211±0.1962	30.1964±0.1788a	2.3030±0.0258
	H2H2（31-41）	0.1889±0.0051	14.1045±0.2002	18.5457±0.2672a	56.8317±0.5927	0.1662±0.0039AB	6.2526±0.2847	3.7324±0.1301	24.1501±0.4454	68.4925±0.3582	29.8153±0.3374a	2.3366±0.0482
	H2H3（46-56）	0.1966±0.0046	14.3737±0.1792	19.7119±0.2370b	57.9389±0.5303	0.1698±0.0033AB	6.7047±0.2642	3.7031±0.1169	25.5349±0.3951	67.4178±0.3204	31.1165±0.2945b	2.2312±0.0426
	P	0.3043	0.3945	0.0003	0.2441	0.013	0.1884	0.4639	0.0306	0.0576	0.0049	0.2894
(CHUK) Block5	H1H1（192-246）	0.1906±0.0028	13.8679±0.1021Aa	19.0212±0.1370Aac	57.7682±0.3127Aa	0.1701±0.0020AB	5.8370±0.1610A	3.7254±0.0718Aa	25.0454±0.2469a	67.9787±0.1867ACa	30.4221±0.1696ACab	2.2744±0.0248ABab
	H1H2（290-351）	0.1917±0.0026	14.3255±0.0938Bb	19.0071±0.1248Aac	56.8690±0.2890Ab	0.1737±0.0018A	6.0505±0.1468A	3.6877±0.0668ACad	24.9719±0.2296a	68.1394±0.1716Aac	30.2975±0.1555Aac	2.2791±0.0227ABab
	H1H3（117-137）	0.1930±0.0033	13.9456±0.1230Ba	19.4324±0.1657Bbc	58.1454±0.3711Ca	0.1640±0.0023B	6.2077±0.1873A	3.6399±0.0851ACacd	25.1541±0.2884a	67.5724±0.2234Aa	30.9290±0.2046Ab	2.2290±0.0296Aa
	H2H2（112-131）	0.1841±0.0033	14.3986±0.1234Bb	18.6345±0.1654Aa	56.2735±0.3758Bb	0.1685±0.0023AB	6.2567±0.1838A	3.4380±0.0843BCbc	24.2295±0.2890b	68.6465±0.2255BCbc	29.7913±0.2060BCcd	2.3519±0.0298Bb
	H2H3（66-82）	0.1913±0.0040	14.1109±0.1506ABab	19.7546±0.2021Bb	58.2975±0.4509Aa	0.1666±0.0029AB	7.0468±0.2211B	3.4384±0.1006ACbd	24.9911±0.3398ab	67.3929±0.2719Aa	30.9619±0.2506Aab	2.2296±0.0361Ba
	P	0.1164	<.0001	<.0001	<.0001	0.0003	<.0001	0.001	0.0256	<.0001	<.0001	0.0049
Notes: P referred to the significances of the association analysis between each haplotype block and milk fatty acid traits. P < 0.05 indicated significance. P < 0.01 indicated highly significance. a,b,c,d within a column with no common superscript letters referred to P < 0.05. A,B,C,D,E within a column with no common superscript letters referred to P < 0.01. The common or no superscript indicated…
